# Supplementary material for: Risks of mining to salmonid-bearing watersheds
Source: PubMed Central journal article supplement — Sci Adv. 2022 Jul 1;8(26):eabn0929. doi: 10.1126/sciadv.abn0929 (PMC10883362; doi:10.1126/sciadv.abn0929), 2022-07-01
Supplement: sciadv.abn0929_sm.pdf [file sciadv.abn0929_sm.pdf]

Supplementary Materials for  
**Risks of mining to salmonid-bearing watersheds**

Christopher J. Sergeant *et al.*

Corresponding author: Christopher J. Sergeant, [christopher.sergeant@umontana.edu](mailto:christopher.sergeant@umontana.edu)

*Sci. Adv.* **8**, eabn0929 (2022)  
DOI: 10.1126/sciadv.abn0929

**This PDF file includes:**

Supplementary Text  
Fig. S1  
Table S1  
References

## Supplementary Text

### Data sources for Figure 1.

Locations and numbers of past producing metal and coal mining projects were derived from three data sources:

1) Data for the states of Alaska, Idaho, Montana, Oregon, and Washington were downloaded from the United States Geological Survey's Mineral Resources Data System (MRDS), which is available at <https://mrdata.usgs.gov/mrds/>. We used the intersection of three attributes in the database to identify and map “past producing mines:”

- Development Status (dev\_stat): ‘Past Producer’ and ‘Producer’ were included
- Commodity Type (com\_type): Metallic commodity ‘M’ and commodity used in metallic and non-metallic forms ‘B’ were included
- Operation Type (oper\_type): ‘Surface’, ‘Surface-Underground’, and ‘Underground’ were included

The final attribute query in ArcGIS was:

```
("dev_stat" = 'Past Producer' OR "dev_stat" = 'Producer') AND  
("com_type" = 'M' OR "com_type" = 'B') AND  
("oper_type" = 'Surface' OR "oper_type" = 'Surface-Underground' OR "oper_type" =  
'Underground')
```

Within the MRDS, producers were defined as, “A mine in production at the time the data was entered. An intermittent producer that produces on demand or seasonally with variable lengths of inactivity is considered a producer.” Past producers were defined as, “A mine formerly operating that has closed, where the equipment or structures may have been removed or abandoned.” Additional data definitions and database details can be found at <https://mrdata.usgs.gov/metadata/mrds.faq.html>.

2) Data for the province of British Columbia were downloaded from the MINFILE Mineral Occurrence Database, which is available at <https://www2.gov.bc.ca/gov/content/industry/mineral-exploration-mining/british-columbia-geological-survey/mineralinventory>. To identify and map “past producing mines,” we used current (producers) and historical (past producers) listed in the status column (STATUS). Producers were defined as, “Currently producing mine. Occurrences from which ore containing one or more commodities is being mined for commercial gain or benefit. This does NOT include large bulk samples for testing purposes.” Past producers were defined as, “Past producing mine. Occurrences that are not currently being mined and have recorded production in the past. This does not include bulk samples for testing purposes.” Within each status, we counted only commodity types (COMDTY\_DS1) listed as coal, copper, gold, iron, lead, molybdenum, nickel, silver, or zinc. Additional data definitions and database details can be found at <https://www2.gov.bc.ca/gov/content/industry/mineral-exploration-mining/british-columbia-geological-survey/mineralinventory/documentation/minfile-coding-manual>.

3) Data for the Yukon Territory were downloaded from the MINFILE Mineral Occurrence Database, which is available at <https://data.geology.gov.yk.ca/Compilation/24#InfoTab>. To identify and map “past producing mines,” we used current (producers) and historical (past producers) listed in the status column (DEP\_STATUS). Producers and past producers were defined in the same manner as for British Columbia, described above. After narrowing down the database to producers and past producers, only 60 projects were listed. Caley and Lind mines were removed as the only projects not listing metallic or coal commodities.

Daily milling rates for the largest 26 operating projects in the study region were derived from the data sources listed in Table S1.

Mineral tenure polygons displayed within the inset of Figure 1 were downloaded from the British Columbia Data Catalogue’s Mineral, Placer, and Coal Tenure Spatial View, which is available at <https://catalogue.data.gov.bc.ca/dataset/mta-mineral-placer-and-coal-tenure-spatial-view>. Information regarding mine location and regulatory status within the inset of Figure 1 was retrieved from the British Columbia Environmental Assessment Office Project Information Centre, which is found at <https://projects.eao.gov.bc.ca/>.

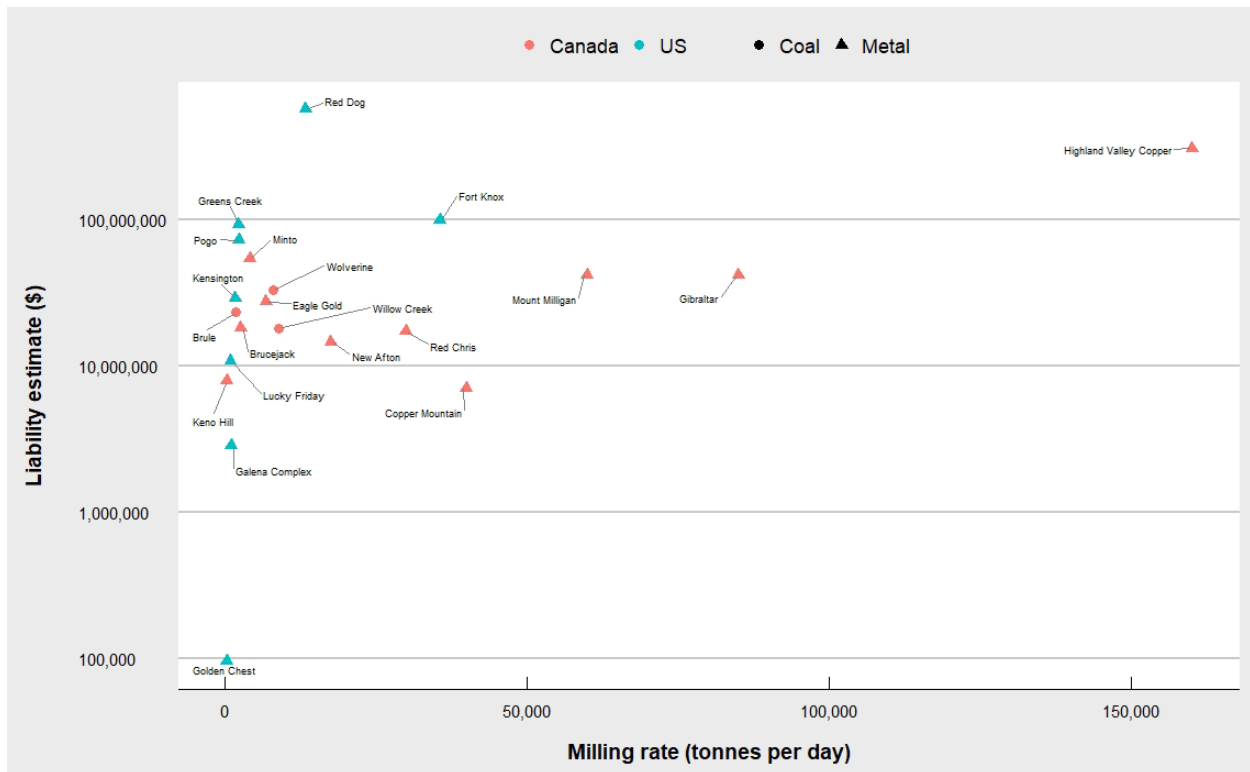

**Fig. S1.**

Relationship between milling rate and liability estimate for individual mines in northwestern North America (summarized in Table S1). The currency for individual liability estimates match the country of origin (Canada = red, US = teal). Shapes represent the type of commodity mined (circle = coal, triangle = metal). Note that the y-axis is log scale.

**Table S1.**

Summary of primary resources, liability estimate, and milling capacity for the largest 26 operating mining projects in northwestern North America.

| Mining project name    | State/prov/territory | Primary resource(s)      | Liability estimate       | Milling capacity (tonnes per day) <sup>2</sup> | Milling capacity data source                |
|------------------------|----------------------|--------------------------|--------------------------|------------------------------------------------|---------------------------------------------|
| Highland Valley Copper | BC                   | Copper, molybdenum       | \$303,416,000<br>(188)   | 160,000                                        | 2017 Annual Reclamation Report, Table 3.3-2 |
| Gibraltar              | BC                   | Copper, molybdenum       | \$41,300,000<br>(188)    | 85,000                                         | 2017 Annual Reclamation Report, Table 2-8   |
| Mount Milligan         | BC                   | Copper, gold             | \$41,868,000<br>(188)    | 60,000                                         | 2017 Annual Reclamation Report, Table 5     |
| Copper Mountain        | BC                   | Copper, gold, silver     | \$7,040,000<br>(188)     | 40,000                                         | 2017 Annual Reclamation Report, Table 2.1   |
| Fort Knox              | AK                   | Gold                     | \$99,231,393<br>(189)    | 35,606                                         | Athey and Werdon 2019 (200)                 |
| Greenhills             | BC                   | Coal                     | Unavailable <sup>1</sup> | 35,000                                         | 2017 Annual Reclamation Report, Table 2-3   |
| Fording River          | BC                   | Coal                     | Unavailable <sup>1</sup> | 30,000                                         | 2017 Annual Reclamation Report, Table 2-3   |
| Red Chris              | BC                   | Copper, gold             | \$17,055,921<br>(188)    | 30,000                                         | 2017 Annual Reclamation Report, Table 2-4   |
| New Afton              | BC                   | Copper, gold             | \$14,361,702<br>(188)    | 17,600                                         | 2017 Annual Reclamation Report, Table 2.6-1 |
| Elkview                | BC                   | Coal                     | Unavailable <sup>1</sup> | 17,226                                         | 2017 Annual Reclamation Report, Table 2-4   |
| Usibelli               | AK                   | Coal                     | Unavailable              | 16,800 <sup>3</sup>                            | Project web page, Mining Equipment (201)    |
| Red Dog                | AK                   | Lead, silver, zinc       | \$585,662,000<br>(190)   | 13,376                                         | Athey and Werdon 2019 (200)                 |
| Line Creek             | BC                   | Coal                     | Unavailable <sup>1</sup> | 11,512                                         | 2017 Annual Reclamation Report, Table 2-3   |
| Willow Creek           | BC                   | Coal                     | \$17,951,375<br>(188)    | 9,000                                          | 2019 Annual Reclamation Report, Table 3     |
| Wolverine              | BC                   | Coal                     | \$33,018,177<br>(188)    | 8,000                                          | 2019 Annual Reclamation Report, Tables 3, 4 |
| Eagle Gold             | YT                   | Gold                     | \$27,406,539<br>(191)    | 6,849                                          | 2019 Annual Report, Page 24                 |
| Minto                  | YT                   | Copper, gold             | \$53,627,572<br>(192)    | 4,200                                          | 2019 Annual Report. Page 1                  |
| Brucejack              | BC                   | Gold, silver             | \$17,993,224<br>(188)    | 2,700                                          | 2017 Annual Reclamation Report, Table 2.1-1 |
| Pogo                   | AK                   | Gold                     | \$71,908,000<br>(193)    | 2,411                                          | Athey and Werdon 2019 (200)                 |
| Greens Creek           | AK                   | Gold, lead, silver, zinc | \$92,176,539<br>(194)    | 2,316                                          | Athey and Werdon 2019 (200)                 |
| Brule (Dillon)         | BC                   | Coal                     | \$23,148,811<br>(188)    | 1,945                                          | 2019 Annual Reclamation Report, Table 2     |
| Kensington             | AK                   | Gold                     | \$30,704,008<br>(195)    | 1,756                                          | Athey and Werdon 2019 (200)                 |
| Galena Complex         | ID                   | Lead, silver             | 2,840,000<br>(196)       | 1,080                                          | 2019 Annual Report, Page 13                 |
| Lucky Friday           | ID                   | Lead, silver, zinc       | 10,700,000<br>(197)      | 1,000                                          | 2019 Annual Report, Page 23                 |
| Keno Hill              | YT                   | Lead, silver, zinc       | 7,871,492<br>(198)       | 400                                            | Project web page (202)                      |
| Golden Chest           | ID                   | Gold                     | 95,000<br>(199)          | 360                                            | Project web page (203)                      |

<sup>1</sup> The total liability estimate for Teck Coal Elk Valley complex of five mines (Elkview, Fording River, Line Creek, Coal Mountain, and Greenhills) equals \$1,404,810,000 CAD

<sup>2</sup> For coal operations, “milling capacity” was calculated as the tonnes per day of ore crushed and washed

<sup>3</sup> Usibelli coal milling capacity interpreted as crusher capacity (700 tons per hour according to project website); website also states that no washing takes place

## REFERENCES AND NOTES

1. J. N. Moore, S. N. Luoma, Hazardous wastes from large-scale metal extraction: A case study. *Environ. Sci. Technol.* **24**, 1278–1285 (1990).
2. A. M. Farag, D. F. Woodward, J. N. Goldstein, W. Brumbaugh, J. S. Meyer, Concentrations of metals associated with mining waste in sediments, biofilm, benthic macroinvertebrates, and fish from the Coeur d'Alene River Basin, Idaho. *Arch. Environ. Contam. Toxicol.* **34**, 119–127 (1998).
3. K. L. Barry, J. A. Grout, C. D. Levings, B. H. Nidle, G. E. Piercey, Impacts of acid mine drainage on juvenile salmonids in an estuary near Britannia Beach in Howe Sound, British Columbia. *Can. J. Fish. Aquat. Sci.* **57**, 2032–2043 (2000).
4. K. Spitz, J. Trudinger, *Mining and the Environment: From Ore to Metal* (CRC Press, 2019).
5. M. Simonin, J. D. Rocca, J. R. Gerson, E. Moore, A. C. Brooks, L. Czaplicki, M. R. V. Ross, N. Fierer, J. M. Craine, E. S. Bernhardt, Consistent declines in aquatic biodiversity across diverse domains of life in rivers impacted by surface coal mining. *Ecol. Appl.* **31**, e02389 (2021).
6. M. Olías, J. M. Nieto, Background conditions and mining pollution throughout history in the Río Tinto (SW Spain). *Environments* **2**, 295–316 (2015).
7. D. Kossoff, W. E. Dubbin, M. Alfredsson, S. J. Edwards, M. G. Macklin, K. A. Hudson-Edwards, Mine tailings dams: Characteristics, failure, environmental impacts, and remediation. *Appl. Geochem.* **51**, 229–245 (2014).
8. C. A. Mebane, C. G. Schmidt, Selenium and mercury in the Kootenai River, Montana and Idaho, 2018–2019 (2019); <https://doi.org/10.5066/P9YYVV7R>.
9. B. G. Lottermoser, *Mine Wastes: Characterization, Treatment, and Environmental Impacts* (Springer, 2010).

10. D. M. Franks, M. Stringer, L. A. Torres-Cruz, E. Baker, R. Valenta, K. Thygesen, A. Matthews, J. Howchin, S. Barrie, Tailings facility disclosures reveal stability risks. *Sci. Rep.* **11**, 5353 (2021).
11. U.S. Government Accountability Office, Abandoned hardrock mines: Information on number of mines, expenditures, and factors that limit efforts to address hazards (2020); <https://gao.gov/assets/710/705146.pdf>.
12. BC Chief Inspector of Mines, Chief Inspector of Mines 2019 annual report (2021); [https://gov.bc.ca/assets/gov/farming-natural-resources-and-industry/mineral-exploration-mining/documents/health-and-safety/ci-annual-reports/112869\\_2019\\_ci\\_annual\\_rpt.pdf](https://gov.bc.ca/assets/gov/farming-natural-resources-and-industry/mineral-exploration-mining/documents/health-and-safety/ci-annual-reports/112869_2019_ci_annual_rpt.pdf).
13. B. K. Sovacool, S. H. Ali, M. Bazilian, B. Radley, B. Nemery, J. Okatz, D. Mulvaney, Sustainable minerals and metals for a low-carbon future. *Science* **367**, 30–33 (2020).
14. C. A. Woody, R. M. Hughes, E. J. Wagner, T. P. Quinn, L. H. Roulson, L. M. Martin, K. Griswold, The mining law of 1872: Change is overdue. *Fisheries* **35**, 321–331 (2010).
15. R. Hilborn, T. P. Quinn, D. E. Schindler, D. E. Rogers, Biocomplexity and fisheries sustainability. *Proc. Natl. Acad. Sci. U.S.A.* **100**, 6564–6568 (2003).
16. X. Augerot, D. N. Foley, C. Steinback, A. Fuller, N. Fobes, K. Spencer, *Atlas of Pacific Salmon: The First Map-Based Status Assessment of Salmon in the North Pacific* (University of California Press, 2005).
17. R. S. Waples, M. Nammack, J. F. Cochrane, J. A. Hutchings, A tale of two acts: Endangered species listing practices in Canada and the United States. *Bioscience* **63**, 723–734 (2013).
18. G. Grill, B. Lehner, M. Thieme, B. Geenen, D. Tickner, F. Antonelli, S. Babu, P. Borrelli, L. Cheng, H. Crochetiere, H. E. Macedo, R. Filgueiras, M. Goichot, J. Higgins, Z. Hogan, B. Lip, M. E. McClain, J. Meng, M. Mulligan, C. Nilsson, J. D. Olden, J. J. Opperman, P. Petry, C. R. Liermann, L. Sáenz, S. Salinas-Rodríguez, P. Schelle, R. J. P. Schmitt, J. Snider, F. Tan, K. Tockner, P. H. Valdujo, A. Soesbergen, C. Zarfl, Mapping the world's free-flowing rivers. *Nature* **569**, 215–221 (2019).

19. F. R. Hauer, H. Locke, V. J. Dreitz, M. Hebblewhite, W. H. Lowe, C. C. Muhlfeld, C. R. Nelson, M. F. Proctor, S. B. Rood, Gravel-bed river floodplains are the ecological nexus of glaciated mountain landscapes. *Sci. Adv.* **2**, e1600026 (2016).
20. D. E. Schindler, X. Augerot, E. Fleishman, N. J. Mantua, B. Riddell, M. Ruckelshaus, J. Seeb, M. Webster, Climate change, ecosystem impacts, and management for Pacific salmon. *Fisheries* **33**, 502–506 (2008).
21. R. S. Waples, G. R. Pess, T. Beechie, Evolutionary history of Pacific salmon in dynamic environments. *Evol. Appl.* **1**, 189–206 (2008).
22. K. J. Pitman, J. W. Moore, M. R. Sloat, A. H. Beaudreau, A. L. Bidlack, R. E. Brenner, E. W. Hood, G. R. Pess, N. J. Mantua, A. M. Milner, V. Radic, G. H. Reeves, D. E. Schindler, D. C. Whited, Glacier retreat and Pacific salmon. *Bioscience* **70**, 220–236 (2020).
23. D. R. Montgomery, J. M. Buffington, Channel-reach morphology in mountain drainage basins. *Geol. Soc. Am. Bull.* **109**, 596–611 (1997).
24. A. M. Milner, A. L. Robertson, L. E. Brown, S. H. S nderland, M. Mcdermott, A. J. Veal, Evolution of a stream ecosystem in recently deglaciated terrain. *Ecology* **92**, 1924–1935 (2011).
25. D. C. Whited, M. S. Lorang, M. J. Harner, F. R. Hauer, J. S. Kimball, J. A. Stanford, Climate, hydrologic disturbance, and succession: Drivers of floodplain pattern. *Ecology* **88**, 940–953 (2007).
26. K. J. Pitman, J. W. Moore, M. Huss, M. R. Sloat, D. C. Whited, T. J. Beechie, R. Brenner, E. W. Hood, A. W. Milner, G. R. Pess, G. H. Reeves, D. E. Schindler, Glacier retreat creating new Pacific salmon habitat in western North America. *Nat. Commun.* **12**, 6816 (2021).
27. J. A. Falke, B. M. Huntsman, E. R. Schoen, Climatic variation drives growth potential of juvenile Chinook salmon along a subarctic boreal riverscape, in *Advances in Understanding Landscape Influences on Freshwater Habitats and Biological Assemblages* (American Fisheries Society, 2019).



28. S. R. Brennan, D. E. Schindler, T. J. Cline, T. E. Walsworth, G. Buck, D. P. Fernandez, Shifting habitat mosaics and fish production across river basins. *Science* **364**, 783–786 (2019).
29. J. W. Moore, M. P. Beakes, H. K. Nesbitt, J. D. Yeakel, D. A. Patterson, L. A. Thompson, C. C. Phillis, D. C. Braun, C. Favaro, D. Scott, C. Carr-Harris, W. I. Atlas, Emergent stability in a large, free-flowing watershed. *Ecology* **96**, 340–347 (2015).
30. S. M. Gende, R. T. Edwards, M. F. Willson, M. S. Wipfli, Pacific salmon in aquatic and terrestrial ecosystems. *Bioscience* **52**, 917–928 (2002).
31. D. E. Schindler, M. D. Scheuerell, J. W. Moore, S. M. Gende, T. B. Francis, W. J. Palen, Pacific salmon and the ecology of coastal ecosystems. *Front. Ecol. Environ.* **1**, 31–37 (2003).
32. T. Levi, C. T. Darimont, M. MacDuffee, M. Mangel, P. Paquet, C. C. Wilmers, Using grizzly bears to assess harvest-ecosystem tradeoffs in salmon fisheries. *PLoS Biol.* **10**, e1001303 (2012).
33. J. W. Moore, D. E. Schindler, C. P. Ruff, Habitat saturation drives thresholds in stream subsidies. *Ecology* **89**, 306–312 (2008).
34. J. J. Verspoor, D. C. Braun, M. M. Stubbs, J. D. Reynolds, Persistent ecological effects of a salmon-derived nutrient pulse on stream invertebrate communities. *Ecosphere* **2**, art18 (2011).
35. J. C. Walsh, J. E. Pendray, S. C. Godwin, K. A. Artelle, H. K. Kindsvater, R. D. Field, J. N. Harding, N. R. Swain, J. D. Reynolds, Relationships between Pacific salmon and aquatic and terrestrial ecosystems: Implications for ecosystem-based management. *Ecology* **101**, e03060 (2020).
36. J. R. Griffiths, D. E. Schindler, J. B. Armstrong, M. D. Scheuerell, D. C. Whited, R. A. Clark, R. Hilborn, C. A. Holt, S. T. Lindley, J. A. Stanford, E. C. Volk, Performance of

- salmon fishery portfolios across western North America. *J. Appl. Ecol.* **51**, 1554–1563 (2014).
37. R. G. Gustafson, R. S. Waples, J. M. Myers, L. A. Weitkamp, G. J. Bryant, O. W. Johnson, J. J. Hard, Pacific salmon extinctions: Quantifying lost and remaining diversity. *Conserv. Biol.* **21**, 1009–1020 (2007).
38. V. S. D'Angelo, C. C. Muhlfeld, Factors influencing the distribution of native bull trout and westslope cutthroat trout in streams of western Glacier National Park, Montana. *Northwest Sci.* **87**, 1–11 (2013).
39. L. G. Crozier, M. M. McClure, T. Beechie, S. J. Bograd, D. A. Boughton, M. Carr, T. D. Cooney, J. B. Dunham, C. M. Greene, M. A. Haltuch, E. L. Hazen, D. M. Holzer, D. D. Huff, R. C. Johnson, C. E. Jordan, I. C. Kaplan, S. T. Lindley, N. J. Mantua, P. B. Moyle, J. M. Myers, M. W. Nelson, B. C. Spence, L. A. Weitkamp, T. H. Williams, E. Willis-Norton, Climate vulnerability assessment for Pacific salmon and steelhead in the California Current Large Marine Ecosystem. *PLOS ONE* **14**, e0217711 (2019).
40. J. Lichatowich, *Salmon without Rivers: A History of the Pacific Salmon Crisis* (Island Press, 2001).
41. T. P. Quinn, *The Behavior and Ecology of Pacific Salmon and Trout* (University of Washington Press, 2018).
42. P. S. Ross, C. J. Kennedy, L. K. Shelley, K. B. Tierney, D. A. Patterson, W. L. Fairchild, R. W. Macdonald, The trouble with salmon: Relating pollutant exposure to toxic effect in species with transformational life histories and lengthy migrations. *Can. J. Fish. Aquat. Sci.* **70**, 1252–1264 (2013).
43. A. Garibaldi, N. Turner, Cultural keystone species: Implications for ecological conservation and restoration. *Ecol. Soc.* **9**, 1 (2004).

44. D. Lepofsky, K. Lertzman, D. Hallett, R. Mathewes, Climate change and culture change on the southern coast of British Columbia 2400-1200 cal. BP: An hypothesis. *Am. Antiq.* **70**, 267–293 (2005).
45. S. K. Campbell, V. L. Butler, Archaeological evidence for resilience of Pacific Northwest salmon populations and the socioecological system over the last ~7,500 years. *Ecol. Soc.* **15**, 17 (2010).
46. L. Chan, O. Receveur, D. Sharp, H. Schwartz, A. Ing, C. Tikhonov, *First Nations Food, Nutrition and Environment Study (FNFNES): Results from British Columbia (2008/2009)* (University of Northern British Columbia, Université de Montréal, and Assembly of First Nations, 2011).
47. H. K. Nesbitt, J. W. Moore, Species and population diversity in Pacific salmon fisheries underpin indigenous food security. *J. Appl. Ecol.* **53**, 1489–1499 (2016).
48. W. I. Atlas, N. C. Ban, J. W. Moore, A. M. Tuohy, S. Greening, A. J. Reid, N. Morvin, E. White, W. G. Housty, J. A. Housty, C. N. Service, L. Greba, S. Harrison, C. Sharpe, K. I. R. Butts, W. M. Shepert, E. Sweeney-Bergen, D. Macintyre, M. R. Sloat, K. Connors, Indigenous systems of management for culturally and ecologically resilient Pacific salmon (*Oncorhynchus* spp.) fisheries. *Bioscience* **71**, 186–204 (2021).
49. J. A. Fall, A. Godduhn, G. Halas, L. Hutchinson-Scarborough, B. Jones, B. McDavid, E. Mikow, L. A. Sill, T. Lemons, “Alaska subsistence and personal use salmon fisheries 2017 annual report” (Technical Paper no. 451, Alaska Department of Fish and Game, Division of Subsistence, 2020).
50. A. C. Johnson, J. R. Bellmore, S. Haught, R. Medel, Quantifying the monetary value of Alaska national forests to commercial Pacific salmon fisheries. *N. Am. J. Fish. Manag.* **39**, 1119–1131 (2019).

51. J. W. Brownscombe, S. D. Bower, W. Bowden, L. Nowell, J. D. Midwood, N. Johnson, S. J. Cooke, Canadian recreational fisheries: 35 years of social, biological, and economic dynamics from a national survey. *Fisheries* **39**, 251–260 (2014).
52. U.S. Geological Survey, “Mineral commodity summaries 2020” (2020); <https://pubs.er.usgs.gov/publication/mcs2020>.
53. Energy and Mines Ministers’ Conference, “Natural resources: Major projects planned or under construction — 2020 to 2030” (2020); [www.nrcan.gc.ca/science-data/data-analysis/major-projects-inventory/22218](http://www.nrcan.gc.ca/science-data/data-analysis/major-projects-inventory/22218).
54. R. J. Goldfarb, C. D. Taylor, A. L. Meier, W. M. D’Angelo, R. M. O’Leary, in *Geologic Studies in Alaska by the US Geological Survey, 1995* (United States Government Printing Office, 1995), pp. 3–18.
55. J. D. LaPerriere, S. M. Wagener, D. M. Bjerklie, Gold-mining effects on heavy metals in streams, circle quadrangle, Alaska. *J. Am. Water Resour. Assoc.* **21**, 245–252 (1985).
56. K. J. Buhl, S. J. Hamilton, Comparative toxicity of inorganic contaminants released by placer mining to early life stages of salmonids. *Ecotoxicol. Environ. Saf.* **20**, 325–342 (1990).
57. R. I. Ferguson, M. Church, C. D. Rennie, J. G. Venditti, Reconstructing a sediment pulse: Modeling the effect of placer mining on Fraser River, Canada, *J. Geophys. Res. Earth.* **120**, 1436–1454 (2015).
58. Alaska Department of Environmental Conservation, “Impaired waterbody listing” (2018); <https://mywaterway.epa.gov/state/AK/water-quality-overview>.
59. B. A. Wills, J. A. Finch, *Wills’ Mineral Processing Technology: An Introduction to the Practical Aspects of Ore Treatment and Mineral Recovery* (Butterworth-Heinemann, 2015).
60. J. B. Whyte, J. Cumming, *Mining Explained: A Layman’s Guide* (Northern Miner, 2007).

61. S. J. Hamilton, K. J. Buhl, Selenium in water, sediment, plants, invertebrates, and fish in the Blackfoot River drainage. *Water Air Soil Pollut.* **159**, 3–34 (2004).
62. L. M. Zinsser, C. A. Mebane, G. C. Mladenka, L. R. Van Every, M. L. Williams, “Spatial and temporal trends in selenium in the upper Blackfoot River watershed, southeastern Idaho, 2001–16” (USGS Scientific Investigations Report 2018-5081, 2018).
63. G. J. S. Govett, *Rock Geochemistry in Mineral Exploration* (Elsevier, 2013).
64. D. M. Chambers, K. Zamzow, Documentation of acidic mining exploration drill cuttings at the Pebble Copper–Gold Mineral Prospect, Southwest Alaska. *Environments* **6**, 78 (2019).
65. U.S. Environmental Protection Agency, “Damage cases and environmental releases from mines and mineral processing sites” (EPA Report A530-R-99-023, EPA Publication, 1997).
66. U.S. Environmental Protection Agency, “Nationwide identification of hardrock mining sites” (EPA Report 2004-P-00005, EPA Publication, 2004).
67. P. C. Singer, W. Stumm, Acidic mine drainage: The rate-determining step. *Science* **167**, 1121–1123 (1970).
68. G. A. Tremblay, C. M. Hogan, Managing orphaned and abandoned mines—a Canadian perspective, paper presented at the Dealing with Derelict Mines Summit organized by CRC-Care, Singleton, NSW, 4 to 6 December 2016.
69. J. van Sickle, S. G. Paulsen, Assessing the attributable risks, relative risks, and regional extents of aquatic stressors. *J. North Am. Benthol. Soc.* **27**, 920–931 (2008).
70. R. Eisler, S. N. Wiemeyer, Cyanide hazards to plants and animals from gold mining and related water issues, in *Reviews of Environmental Contamination and Toxicology* (Springer, 2004), vol. 183, pp. 21–54.
71. S. N. Luoma, P. S. Rainbow, *Metal Contamination in Aquatic Environments: Science and Lateral Management* (Cambridge Univ. Press, 2011).

72. J. R. Ferrari, T. R. Lookingbill, B. McCormick, P. A. Townsend, K. N. Eshleman, Surface mining and reclamation effects on flood response of watersheds in the central Appalachian Plateau region. *Water Resour. Res.* **45**, W04407 (2009).
73. A. J. Miller, N. P. Zégre, Mountaintop removal mining and catchment hydrology. *Water* **6**, 472–499 (2014).
74. N. J. Shatilla, thesis, McMaster University, Hamilton, Ontario (2013).
75. A. Maest, R. Prucha, C. Wobus, Hydrologic and water quality modeling of the Pebble Mine Project pit lake and downstream environment after mine closure. *Minerals* **10**, 727 (2020).
76. I. T. Stewart, D. R. Cayan, M. D. Dettinger, Changes toward earlier streamflow timing across western North America. *J. Climate* **18**, 1136–1155 (2005).
77. N. Mantua, I. Tohver, A. Hamlet, Climate change impacts on streamflow extremes and summertime stream temperature and their possible consequences for freshwater salmon habitat in Washington State. *Clim. Change* **102**, 187–223 (2010).
78. V. Radić, A. J. Cannon, B. Menounos, N. Gi, Future changes in autumn atmospheric river events in British Columbia, Canada, as projected by CMIP5 global climate models. *J. Geophys. Res. Atmos.* **120**, 9279–9302 (2015).
79. J. D. Olden, R. J. Naiman, Incorporating thermal regimes into environmental flows assessments: Modifying dam operations to restore freshwater ecosystem integrity. *Freshw. Biol.* **55**, 86–107 (2010).
80. G. Power, R. S. Brown, J. G. Imhof, Groundwater and fish—Insights from northern North America. *Hydrol. Process.* **13**, 401–422 (1999).
81. L. Wirth, A. Rosenberger, A. Prakash, R. Gens, F. J. Margraf, T. Hamazaki, A remote-sensing, GIS-based approach to identify, characterize, and model spawning habitat for fall-run chum salmon in a sub-arctic, glacially fed river. *Trans. Am. Fish. Soc.* **141**, 1349–1363 (2012).

82. K. L. Webster, F. D. Beall, I. F. Creed, D. P. Kreuzweiser, Impacts and prognosis of natural resource development on water and wetlands in Canada's boreal zone. *Environ. Rev.* **23**, 78–131 (2015).
83. S. F. Railsback, Why it is time to put PHABSIM out to pasture. *Fisheries* **41**, 720–725 (2016).
84. M. J. Bradford, P. S. Higgins, J. Korman, J. Snee, Test of an environmental flow release in a British Columbia river: Does more water mean more fish? *Freshw. Biol.* **56**, 2119–2134 (2011).
85. M. A. Palmer, E. S. Bernhardt, W. H. Schlesinger, K. N. Eshleman, E. Foufoula-Georgiou, M. S. Hendryx, A. D. Lemly, G. E. Likens, O. L. Loucks, M. E. Power, P. S. White, P. R. Wilcock, Mountaintop mining consequences. *Science* **327**, 148–149 (2010).
86. J. Lewin, B. E. Davies, P. J. Wolfenden, Interactions between channel change and historic mining sediments, in *River Channel Changes* (Wiley, 1977), pp. 353–367.
87. E. L. Petticrew, S. J. Albers, S. A. Baldwin, E. C. Carmack, S. J. Déry, N. Gantner, K. E. Graves, B. Laval, J. Morrison, P. N. Owens, D. T. Selbie, S. Vagle, The impact of a catastrophic mine tailings impoundment spill into one of North America's largest fjord lakes: Quesnel Lake, British Columbia, Canada. *Geophys. Res. Lett.* **42**, 3347–3355 (2015).
88. L. Nikl, B. Wernick, J. Van Geest, C. Hughes, K. McMahan, L. Anglin, Mount Polley mine embankment breach: Overview of aquatic impacts and rehabilitation, in *Proceedings Tailings and Mine Waste 2016*, Keystone, Colorado (UBC Studios, 2016), pp. 1–13.
89. A. K. Hamilton, B. E. Laval, E. L. Petticrew, S. J. Albers, M. Allchin, S. A. Baldwin, E. C. Carmack, S. J. Dery, T. D. French, B. Granger, K. E. Graves, P. N. Owens, D. T. Selbie, S. Vagle, Seasonal turbidity linked to physical dynamics in a deep lake following the catastrophic 2014 Mount Polley mine tailings spill. *Water Resour. Res.*, **56**, e2019WR025790 (2020).

90. Z. Lyu, J. Chai, Z. Xu, Y. Qin, J. Cao, A comprehensive review on reasons for tailings dam failures based on case history. *Adv. Civ. Eng.* **2019**, 4159306 (2019).
91. BC Hydro, “New transmission line ready to power Northwest B.C.” (2014);  
[www.bchydro.com/news/press\\_centre/news\\_releases/2014/new-transmission-line-ready-to-power-northwest-bc.html/](http://www.bchydro.com/news/press_centre/news_releases/2014/new-transmission-line-ready-to-power-northwest-bc.html/).
92. D. M. Price, T. Quinn, R. J. Barnard, Fish passage effectiveness of recently constructed road crossing culverts in the Puget Sound region of Washington State. *N. Am. J. Fish. Manag.* **30**, 1110–1125 (2010).
93. S. C. Trombulak, C. A. Frissell, Review of ecological effects of roads on terrestrial and aquatic communities. *Conserv. Biol.* **14**, 18–30 (2000).
94. L. E. Richards, Environmental management in the minerals industry: Theory and practice. *Bus. Strategy Environ.* **5**, 87–93 (1996).
95. G. Hilson, B. Murck, Sustainable development in the mining industry: Clarifying the corporate perspective. *Resour. Policy* **26**, 227–238 (2000).
96. E. V. Axtmann, S. N. Luoma, Large-scale distribution of metal contamination in the fine-grained sediments of the Clark Fork River, Montana, U.S.A. *Appl. Geochem.* **6**, 75–88 (1991).
97. K. J. Hartman, M. D. Kaller, J. W. Howell, J. A. Sweka, How much do valley fills influence headwater streams? *Hydrobiologia* **532**, 91–102 (2005).
98. T. T. Lindberg, E. S. Bernhardt, R. Bier, A. M. Helton, R. B. Merola, A. Vengosh, R. T. D. Giulio, Cumulative impacts of mountaintop mining on an Appalachian watershed. *Proc. Natl. Acad. Sci. U.S.A.* **108**, 20929–20934 (2011).
99. U.S. Environmental Protection Agency, “The effects of mountaintop mines and valley fills on aquatic ecosystems of the central Appalachian coalfields” (EPA Report EPA/600/R-09/138E, EPA Publication, 2011).



100. D. K. Nordstrom, C. N. Alpers, C. J. Ptacek, D. W. Blowes, Negative pH and extremely acidic mine waters from Iron Mountain, California. *Environ. Sci. Technol.* **34**, 254–258 (2000).
101. S. O. Helgen, J. N. Moore, Natural background determination and impact quantification in trace metal-contaminated river sediments. *Environ. Sci. Technol.* **30**, 129–135 (1995).
102. D. W. Blowes, C. J. Ptacek, J. L. Jambor, C. G. Weisener, The geochemistry of acid mine drainage, in *Environmental Geochemistry (Treatise on Geochemistry)* (Elsevier, 2005), vol. 9, pp. 149–204.
103. X. Zhang, L. Yang, Y. Li, H. Li, W. Wang, B. Ye, Impacts of lead/zinc mining and smelting on the environment and human health in China. *Environ. Monit. Assess.* **184**, 2261–2273 (2012).
104. C. Pearson, D. Howard, C. Moore, D. Obrist, Mercury and trace metal wet deposition across five stations in Alaska: Controlling factors, spatial patterns, and source regions. *Atmos. Chem. Phys.* **19**, 6913–6929 (2019).
105. D. Jaffe, E. Prestbo, P. Swartzendruber, P. Weiss-Penzias, S. Kato, A. Takami, S. Hatakeyama, Y. Kajii, Export of atmospheric mercury from Asia. *Atmos. Environ.* **39**, 3029–3038 (2005).
106. R. L. Saunders, J. B. Sprague, Effects of copper-zinc mining pollution on a spawning migration of Atlantic salmon. *Water Res.* **1**, 419–432 (1967).
107. C. A. Mebane, R. J. Eakins, B. G. Fraser, W. J. Adams, Recovery of a mining-damaged stream ecosystem. *Elementa* **3**, 000042 (2015).
108. A. Moore, An electrophysiological study on the effects of pH on olfaction in mature male Atlantic salmon (*Salmo salar*) parr. *J. Fish Biol.* **45**, 493–502 (1994).

109. A. O. H. C. Leduc, E. Roh, M. C. Harvey, G. E. Brown, Impaired detection of chemical alarm cues by juvenile wild Atlantic salmon (*Salmo salar*) in a weakly acidic environment. *Can. J. Fish. Aquat. Sci.* **63**, 2356–2363 (2006).
110. J. K. McIntyre, D. H. Baldwin, D. A. Beauchamp, N. L. Scholz, Low-level copper exposures increase visibility and vulnerability of juvenile coho salmon to cutthroat trout predators. *Ecol. Appl.* **22**, 1460–1471 (2012).
111. J. M. Morris, S. F. Brinkman, R. Takeshita, A. K. McFadden, M. W. Carney, J. Lipton, Copper toxicity in Bristol Bay headwaters: Part 2—Olfactory inhibition in low-hardness water. *Environ. Toxicol. Chem.* **38**, 198–209 (2019).
112. K. L. Hogsden, J. S. Harding, Consequences of acid mine drainage for the structure and function of benthic stream communities: A review. *Freshw. Sci.* **31**, 108–120 (2012).
113. J. M. Morris, S. F. Brinkman, M. W. Carney, J. Lipton, Copper toxicity in Bristol Bay headwaters: Part 1—Acute mortality and ambient water quality criteria in low-hardness water. *Environ. Toxicol. Chem.* **38**, 190–197 (2019).
114. C. A. Mebane, F. S. Dillon, D. P. Hennessy, Acute toxicity of cadmium, lead, zinc, and their mixtures to stream-resident fish and invertebrates. *Environ. Toxicol. Chem.* **31**, 1334–1348 (2012).
115. H. W. Lorz, B. P. McPherson, Effects of copper or zinc in fresh water on the adaptation to sea water and ATPase activity, and the effects of copper on migratory disposition of coho salmon (*Oncorhynchus kisutch*). *J. Fish. Res. Board Can.* **33**, 2023–2030 (1976).
116. T. R. Maret, D. E. MacCoy, Fish assemblages and environmental variables associated with hard-rock mining in the Coeur d’Alene River Basin, Idaho. *Trans. Am. Fish. Soc.* **131**, 865–884 (2002).
117. H. Lefcort, J. Vancura, E. L. Lider, 75 years after mining ends stream insect diversity is still affected by heavy metals. *Ecotoxicology* **19**, 1416–1425 (2010).

118. S. J. Hamilton, Review of selenium toxicity in the aquatic food chain. *Sci. Total Environ.* **326**, 1–31 (2004).
119. A. D. Lemly, Symptoms and implications of selenium toxicity in fish: The Belews Lake case example. *Aquat. Toxicol.* **57**, 39–49 (2002).
120. J. A. Hansen, J. Lipton, P. G. Welsh, D. Cacela, B. MacConnell, Reduced growth of rainbow trout (*Oncorhynchus mykiss*) fed a live invertebrate diet pre-exposed to metal-contaminated sediments. *Environ. Toxicol. Chem.* **23**, 1902–1911 (2004).
121. P. N. Duinker, L. A. Greig, The impotence of cumulative effects assessment in Canada: Ailments and ideas for redeployment. *Environ. Manag.* **37**, 153–161 (2006).
122. A. L. Whitehead, H. Kujala, B. A. Wintle, Dealing with cumulative biodiversity impacts in strategic environmental assessment: A new frontier for conservation planning. *Conserv. Lett.* **10**, 195–204 (2017).
123. A. R. Westwood, M. Olszynski, C. H. Fox, A. T. Ford, A. L. Jacob, J. W. Moore, W. J. Palen, The role of science in contemporary Canadian environmental decision making: The example of environmental assessment. *Univ. B. C. Law Rev.* **52**, 243 (2019).
124. R. K. Morgan, Environmental impact assessment: The state of the art. *Impact Assess. Proj. A.* **30**, 5–14 (2012).
125. Government of Canada, “Yukon environmental and socio-economic assessment act” (2003); <https://laws-lois.justice.gc.ca/eng/acts/y-2.2/index.html>.
126. G. E. Beanlands, P. N. Duinker, *An Ecological Framework for Environmental Impact Assessment in Canada*. Institute for Resource and Environmental Studies (Dalhousie University and Federal Environmental Assessment Review Office, 1983).
127. P. Hackett, J. Liu, B. Noble, Human health, development legacies, and cumulative effects: Environmental assessments of hydroelectric projects in the Nelson River watershed, Canada, *Impact Assess. Proj. A.* **36**, 413–424 (2018).

128. Impact Assessment Agency of Canada, “Basics of environmental assessment under CEAA 2012” (2021); [www.canada.ca/en/impact-assessment-agency/services/environmental-assessments/basics-environmental-assessment.html](http://www.canada.ca/en/impact-assessment-agency/services/environmental-assessments/basics-environmental-assessment.html).
129. A. L. Jacob, J. W. Moore, C. H. Fox, E. J. Sunter, D. Gauthier, A. R. Westwood, A. T. Ford, Cross-sectoral input for the potential role of science in Canada’s environmental assessment. *FACETS* **3**, 512–529 (2018).
130. L. A. Greig, P. N. Duinker, A proposal for further strengthening science in environmental impact assessment in Canada. *Impact Assess. Proj. A.* **29**, 159–165 (2011).
131. M. Doelle, CEAA 2012: The end of federal EA as we know it? *J. Environ. Law Pract.* **24**, 1–17 (2012).
132. A. J. MacKinnon, P. N. Duinker, T. R. Walker, *The Application of Science in Environmental Impact Assessment* (Routledge, 2018).
133. M. McNutt, Journals unite for reproducibility. *Science* **346**, 679 (2014).
134. M. D. Wilkinson, M. Dumontier, I. J. Aalbersberg, G. Appleton, M. Axton, A. Baak, N. Blomberg, J.-W. Boiten, L. B. da Silva Santos, P. E. Bourne, J. Bouwman, A. J. Brooks, T. Clark, M. Crosas, I. Dillo, O. Dumon, S. Edmunds, C. T. Evelo, R. Finkers, A. Gonzalez-Beltran, A. J. G. Gray, P. Groth, C. Goble, J. S. Grethe, J. Heringa, P. A. C. ‘t Hoen, R. Hooft, T. Kuhn, R. Kok, J. Kok, S. J. Lusher, M. E. Martone, A. Mons, A. L. Packer, B. Persson, P. Rocca-Serra, M. Roos, R. van Schaik, S.-A. Sansone, E. Schultes, T. Sengstag, T. Slater, G. Strawn, M. A. Swertz, M. Thompson, J. van der Lei, E. van Mulligan, J. Velterop, A. Waagmeester, P. Wittenburg, K. Wolstencroft, J. Zhao, B. Mons, The FAIR guiding principles for scientific data management and stewardship. *Sci. Data* **3**, 160018 (2016).
135. J. Kuipers, A. S. Maest, K. A. MacHardy, G. Lawson, “Comparison of predicted and actual water quality at hardrock mines: The reliability of predictions in environmental impact statements” (Earthworks, 2006).

136. B. Roach, T. R. Walker, Aquatic monitoring programs conducted during environmental impact assessments in Canada: Preliminary assessment before and after weakened environmental regulation. *Environ. Monit. Assess.* **189**, 109 (2017).
137. W. Adams, R. Blust, R. Dwyer, D. Mount, E. Nordheim, P. H. Rodriguez, D. Spry, Bioavailability assessment of metals in freshwater environments: A historical review. *Environ. Toxicol. Chem.* **39**, 48–59 (2020).
138. J. B. Rasmussen, L. Godbout, M. Schallenberg, The humic content of lake water and its relationship to watershed and lake morphometry. *Limnol. Oceanogr.* **34**, 1336–1343 (1989).
139. C. A. Mebane, T. S. Schmidt, J. L. Miller, L. S. Balistrieri, Bioaccumulation and toxicity of cadmium, copper, nickel, and zinc and their mixtures to aquatic insect communities. *Environ. Toxicol. Chem.* **39**, 812–833 (2020).
140. S. A. Nagorski, J. N. Moore, T. E. McKinnon, D. B. Smith, Scale-dependent temporal variations in stream water geochemistry. *Environ. Sci. Technol.* **37**, 859–864 (2003).
141. N. F. Gray, Environmental impact and remediation of acid mine drainage: A management problem. *Environ. Geol.* **30**, 62–71 (1997).
142. I. Park, C. B. Tabein, S. Jeon, X. Li, K. Seno, M. Ito, N. Hiroyoshi, A review of recent strategies for acid mine drainage prevention and mine tailings recycling. *Chemosphere* **219**, 588–606 (2019).
143. L. S. Balistrieri, C. A. Mebane, Predicting the toxicity of metal mixtures. *Sci. Total Env.* **466**, 788–799 (2014).
144. W. H. Clements, D. B. Herbst, M. I. Hornberger, C. A. Mebane, T. M. Short, Long-term monitoring reveals convergent patterns of recovery from mining contamination across 4 western US watersheds. *Freshw. Sci.* **40**, 407–426 (2021).

145. M. L. Hunter Jr, M. J. Bean, D. B. Lindenmayer, D. S. Wilcove, Thresholds and the mismatch between environmental laws and ecosystems. *Conserv. Biol.* **23**, 1053–1055 (2009).
146. A. J. Sinclair, M. Doelle, P. N. Duinker, Looking up, down, and sideways: Reconceiving cumulative effects assessment as a mindset. *Environ. Impact Assess.* **62**, 183–194 (2017).
147. D. M. Franks, D. Brereton, C. J. Moran, The cumulative dimensions of impact in resource regions. *Resour. Policy.* **38**, 640–647 (2013).
148. G. G. Singh, J. Lerner, M. Mach, C. Clarke Murray, B. Ranieri, G. P. S. Laurent, J. Wong, A. Guimaraes, G. Yunda-Guarin, T. Satterfield, K. M. Chan, Scientific shortcomings in environmental impact statements internationally. *People Nat.* **2**, 369–379 (2020).
149. L. J. Sonter, S. H. Ali, J. E. Watson, Mining and biodiversity: Key issues and research needs in conservation science. *Proc. R. Soc. B.* **285**, 20181926 (2018).
150. I. M. Côté, E. S. Darling, C. J. Brown, Interactions among ecosystem stressors and their importance in conservation. *Proc. R. Soc. B.* **283**, 20152592 (2016).
151. E. K. Sexton, C. J. Sergeant, J. W. Moore, A. R. Westwood, D. M. Chambers, M. V. McPhee, S. A. Nagorski, S. L. O’Neal, J. Weitz, A. Berchtold, M. Capito, C. A. Frissell, J. Hamblen, F. R. Hauer, L. A. Jones, G. Knox, R. Macnair, R. L. Malison, V. Marlatt, J. McIntyre, N. Skuce, D. C. Whited, Canada’s mines pose transboundary risks. *Science* **368**, 376–377 (2020).
152. J. W. Moore, C. Carr-Harris, A. S. Gottesfeld, D. MacIntyre, D. Radies, M. Cleveland, C. Barnes, W. Joseph, G. Williams, J. Gordon, B. Shepert, Selling First Nations down the river. *Science* **349**, 596 (2015).
153. Washington Department of Ecology, *Administrative Order Docket #13638 to Buckhorn Mountain Mine* (WADOE, sent 19 July 2016).

154. Alaska Public Media, “As Arctic warming accelerates, permafrost thaw hits Red Dog mine with \$20 million bill” (2020); [www.alaskapublic.org/2020/09/01/as-arctic-warming-accelerates-permafrost-thaw-hits-red-dog-mine-with-20-million-bill/](http://www.alaskapublic.org/2020/09/01/as-arctic-warming-accelerates-permafrost-thaw-hits-red-dog-mine-with-20-million-bill/).
155. Teck, “Reverse osmosis treatment plant start up” (2020); [www.alaskapublic.org/wp-content/uploads/2020/08/RO-Anouncement.pdf](http://www.alaskapublic.org/wp-content/uploads/2020/08/RO-Anouncement.pdf).
156. T. D. Pearce, J. D. Ford, J. Prno, F. Duerden, J. Pittman, M. Beaumier, L. Berrang-Ford, B. Smit, Climate change and mining in Canada. *Mitig. Adapt. Strateg. Glob. Chang.* **16**, 347–368 (2011).
157. Environment and Climate Change Canada, “Teck coal limited – Conviction information for 2017-10-05” (2017); <https://environmental-protection.canada.ca/offenders-registry/Home/Record?RefNumber=198>.
158. J. T. Quigley, D. J. Harper, Compliance with Canada’s Fisheries Act: A field audit of habitat compensation projects. *Environ. Manag.* **37**, 336–350 (2006).
159. E. Zambello, L. Olander, E. Glidden-Lyon, E. Meza, J. Wilkinson, “Trends in measuring biodiversity and ecosystem function in mitigation quantification methodologies” (Working Paper NI-WP-19-01, Duke University, 2018).
160. W. Colgan, H. H. Thomsen, M. Citterio, Unique applied glaciology challenges of proglacial mining. *Geol. Surv. Den. Greenl.* **33**, 61–64 (2015).
161. S. D. Odell, A. Bebbington, K. E. Frey, Mining and climate change: A review and framework for analysis. *Extr. Ind. Soc.* **5**, 201–214 (2018).
162. A. R. Sharma, S. J. Déry, Contribution of atmospheric rivers to annual, seasonal, and extreme precipitation across British Columbia and southeastern Alaska. *J. Geophys. Res. Atmos.* **125**, e2019031823 (2020).

163. T. D. Pearce, J. D. Ford, F. Duerden, B. Smit, M. Andrachuk, L. Berrang-Ford, T. Smith, Advancing adaptation planning for climate change in the Inuvialuit Settlement Region (ISR): A review and critique. *Reg. Environ. Chang.* **11**, 1–17 (2011).
164. E. Mavrommatis, D. Damigos, S. Mirasgedis, Towards a comprehensive framework for climate change multi-risk assessment in the mining industry. *Infrastructures* **4**, 38 (2019).
165. H. Ghaffari, J. Huang, K. Jones, J. Gray, R. Hammett, R. W. Parolin, D. Kinakin, M. Lechner, J. G. Parkinson, P. Pelletier, N. Brazier, S. Allard, T. Lipiec, M. Ramirez, “2016 KSM (Kerr-Sulphurets-Mitchell) prefeasibility study update and preliminary economic assessment” (2016); [www.miningdataonline.com/reports/KSM\\_PFS\\_PEA\\_112016.pdf](http://www.miningdataonline.com/reports/KSM_PFS_PEA_112016.pdf).
166. P. J. Griffin, thesis, University of Washington, Seattle, WA (2019).
167. P. N. Duinker, L. A. Greig, Scenario analysis in environmental impact assessment: Improving explorations of the future. *Environ. Impact Assess. Rev.* **27**, 206–219 (2007).
168. M. J. Kennard, S. J. Mackay, B. J. Pusey, J. D. Olden, N. Marsh, Quantifying uncertainty in estimation of hydrologic metrics for ecohydrological studies. *River Res. Appl.* **26**, 137–156 (2010).
169. Alaska Department of Transportation, “Alaska highway drainage manual,” Revised June 13, 2006 (2006); [http://dot.alaska.gov/stwddes/desbridge/pop\\_hwydrnman.shtml](http://dot.alaska.gov/stwddes/desbridge/pop_hwydrnman.shtml).
170. C. J. Sergeant, S. A. Nagorski, The implications of monitoring frequency for describing riverine water quality regimes. *River Res. Appl.* **31**, 602–610 (2015).
171. U.S. Army Corps of Engineers, “Army finds Pebble Mine project cannot be permitted as proposed” (2020); [www.army.mil/article/238426/army\\_finds\\_pebble\\_mine\\_project\\_cannot\\_be\\_permitted\\_as\\_proposed](http://www.army.mil/article/238426/army_finds_pebble_mine_project_cannot_be_permitted_as_proposed).
172. A. Wittenberg, J. Marshall, T. Cama, In reversal, “Trump kills huge Alaskan gold mine. Here’s why,” *Science* (2020).



173. Impact Assessment Agency of Canada, “Decision statement issued under Section 54 of the Canadian Environmental Assessment Act, 2012” (2014); [www.ceaa-acee.gc.ca/050/evaluations/document/98458?culture=en-CA](http://www.ceaa-acee.gc.ca/050/evaluations/document/98458?culture=en-CA).
174. Impact Assessment Agency of Canada, “Decision statement issued under Section 54 of the Canadian Environmental Assessment Act, 2012” (2021); <https://iaac-aeic.gc.ca/050/evaluations/document/140985?&culture=en-CA>.
175. BC Ministry of Environment and Climate Change Strategy, “Ministers’ reasons for decision: Morrison copper-gold project” (2022), p. 4.
176. U.S. Environmental Protection Agency, “Aquatic life ambient water quality criterion for selenium – Freshwater 2016” (EPA Report 822-R-16-006, EPA Publication, 2016).
177. C. J. Sergeant, B. J. Moynahan, W. F. Johnson, Practical advice for implementing long-term ecosystem monitoring. *J. Appl. Ecol.* **49**, 969–973 (2012).
178. B. R. Collison, P. A. Reid, H. Dvorski, M. J. Lopez, A. R. Westwood, N. Skuce, Undermining environmental assessment laws: Post-assessment amendments for mines in British Columbia, Canada, and potential impacts on water resources. *Facets* **7**, 611–638 (2022).
179. D. Gerard, The law and economics of reclamation bonds. *Resour. Policy.* **26**, 189–197 (2000).
180. A. H. Watson, in *Proceedings of the First International Seminar on Mine Closure* (Australian Centre for Geomechanics, 2006), pp. 493–497.
181. L. Cheng, J. G. Skousen, Comparison of international mine reclamation bonding systems with recommendations for China. *Int. J. Coal Sci. Technol.* **4**, 67–79 (2017).
182. E. S. Norman, *Governing Transboundary Waters: Canada, The United States, and Indigenous Communities* (Routledge, 2015).

183. M. A. Giordano, Managing the quality of transboundary rivers: International principles and basin-level practice. *Nat. Resour. J.* **43**, 111–136 (2003).
184. N. D. Hall, Transboundary pollution: Harmonizing international and domestic law. *U. Mich. JL Reform.* **40**, 681–746 (2007).
185. N. D. Hall, The centennial of the Boundary Waters Treaty: A century of United States-Canadian transboundary water management. *Wayne L. Rev.* **54**, 1417–1449 (2008).
186. International Joint Commission, “Impacts of a proposed coal mine in the Flathead River Basin” (International Joint Commission Digital Archive, 1988); <https://scholar.uwindsor.ca/ijcarchive/369>.
187. F. R. Hauer, C. C. Muhlfeld, Compelling science saves a river valley. *Science* **327**, 1576–1576 (2010).
188. BC Chief Inspector of Mines, “Chief Inspector of Mines 2018 annual report” (2019); [www2.gov.bc.ca/assets/gov/farming-natural-resources-and-industry/mineral-exploration-mining/documents/health-and-safety/ci-annual-reports/2018\\_ci\\_annual\\_rpt.pdf](http://www2.gov.bc.ca/assets/gov/farming-natural-resources-and-industry/mineral-exploration-mining/documents/health-and-safety/ci-annual-reports/2018_ci_annual_rpt.pdf).
189. State of Alaska, Department of Natural Resources, Division of Mining, Land and Water (2014); <https://dnr.alaska.gov/mlw/mining/large-mines/fort-knox/pdf/fgmibond2014.pdf>.
190. State of Alaska, Department of Natural Resources, Division of Mining, Land and Water (2021); <https://dnr.alaska.gov/mlw/mining/large-mines/red-dog/pdf/rdfa2021.pdf>.
191. Government of Yukon, Energy, Mines and Resources (2019); [https://emr-ftp.gov.yk.ca/emrweb/COMM/major-mines/eagle-gold/mml\\_eg\\_financial\\_security\\_determination\\_summary\\_table.pdf](https://emr-ftp.gov.yk.ca/emrweb/COMM/major-mines/eagle-gold/mml_eg_financial_security_determination_summary_table.pdf).
192. Government of Yukon, Energy, Mines and Resources (2015); [https://emr-ftp.gov.yk.ca/emrweb/COMM/major-mines/minto/mml\\_minto\\_determination\\_of\\_financial\\_security\\_jan2015.pdf](https://emr-ftp.gov.yk.ca/emrweb/COMM/major-mines/minto/mml_minto_determination_of_financial_security_jan2015.pdf).

193. State of Alaska, Department of Natural Resources, Division of Mining, Land and Water (2022); <https://dnr.alaska.gov/mlw/mining/large-mines/pogo/>.
194. State of Alaska, Department of Natural Resources, Division of Mining, Land and Water (2020); <https://dnr.alaska.gov/mlw/mining/large-mines/greens-creek/pdf/2020-7-21-MOU-Greens-Creek-Mine-Final.pdf>.
195. State of Alaska, Department of Natural Resources, Division of Mining, Land and Water (2021); <https://dnr.alaska.gov/mlw/mining/large-mines/kensington/pdf/511336-Kensington-Reclamation-Bond-Swap.pdf>.
196. Americas Silver Corporation, “Technical report on the Galena complex” (Report NI 43-101, Shoshone County, Idaho, USA, 2016); [www.sec.gov/Archives/edgar/data/1286973/000106299317000127/exhibit99-73.htm](http://www.sec.gov/Archives/edgar/data/1286973/000106299317000127/exhibit99-73.htm).
197. Hecla Mining Company, “Form 10-K, annual report pursuant to Section 13 or 15(d) of the Securities Exchange Act of 1934” (2019); [www.sec.gov/Archives/edgar/data/719413/000143774919003108/hl20181231\\_10k.htm](http://www.sec.gov/Archives/edgar/data/719413/000143774919003108/hl20181231_10k.htm).
198. Government of Yukon, Energy, Mines and Resources (2019); [https://emr-ftp.gov.yk.ca/emrweb/COMM/major-mines/keno-hill/mml-keno-amendment-berminghamcover\\_letter-nov2019.pdf](https://emr-ftp.gov.yk.ca/emrweb/COMM/major-mines/keno-hill/mml-keno-amendment-berminghamcover_letter-nov2019.pdf).
199. New Jersey Mining Company, “Form 10-K, Annual report pursuant to Section 13 or 15(d) of the Securities Exchange Act of 1934” (2015); [www.sec.gov/Archives/edgar/data/1030192/000105291815000115/njmc10kmar3115final.htm](http://www.sec.gov/Archives/edgar/data/1030192/000105291815000115/njmc10kmar3115final.htm).
200. J. E. Athey, M. B. Werdon, “Alaska’s mineral industry 2018: Alaska Division of Geological & Geophysical Surveys Special Report 74” (2019); <https://doi.org/10.14509/30227>.
201. Usibelli Coal Mine, “Mining equipment” (2022); [www.usibelli.com/mining/mining-equipment](http://www.usibelli.com/mining/mining-equipment).

202. Alexco, “Keno Hill Silver District project page” (2022);  
[www.alexcoresource.com/operations/overview/](http://www.alexcoresource.com/operations/overview/).

203. Idaho Strategic Resources, “Golden Chest Mine project page” (2022);  
<https://idahostrategic.com/production/>.
